# Supplementary material for: タンゴから聴こえるバラード : コルタサル「帰還のタンゴ」とボウエン「悪魔の恋人」をめぐって (特集 ラテンアメリカ文学 : 野谷文昭教授記念号)
Source: MDPI journal article supplement (doi:10.3390/ijms22179291), 2013-01-01
Supplement: s1 [file s1]

## Supplemental figures

**Supplementary Figure S1** Functional identification of MtGA3ox1 and profile of endogenous GAs in wild type R108 and *ga3ox1* mutant. **(A)** RT-PCR for *MtGA3ox1* in leaves of wild type R108 and three *ga3ox1* mutant lines. Actin was used as a reference gene. **(B)** Phylogenetic tree analysis. The phylogenetic tree was constructed by the neighbor-joining method with 1000 bootstrap replicates by using the software MEGA7.0 (<http://www.megasoftware.net/>). Numbers indicate confidence percentages. **(C)** GAs biosynthesis pathway. **(D)** Profile of endogenous GAs in wild type R108 and *ga3ox1* mutant based on HPLC-MS analysis. The GA levels were determined in leaves of one-month-old *M. truncatula*, which are presented as the mean  $\pm$  SD (n=3 biological independent samples). \* $P$ <0.05, \*\* $P$ <0.01, and \*\*\* $P$ <0.001.

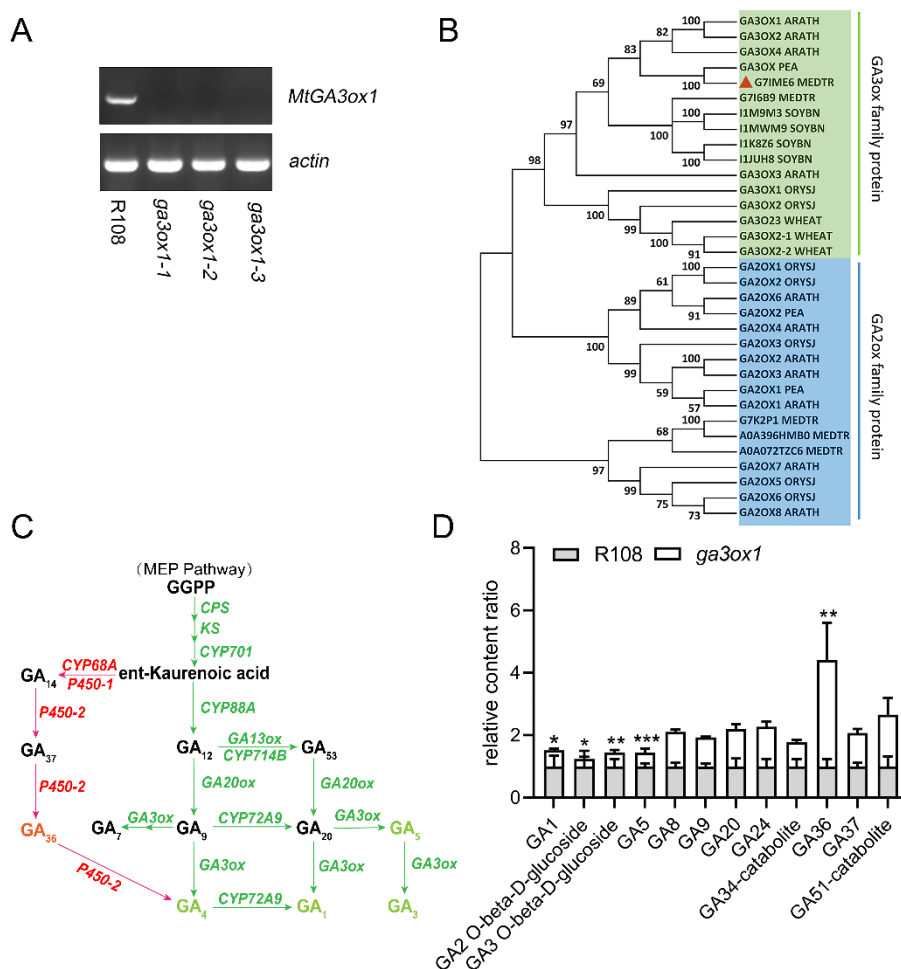

**Supplementary Figure S2** Phenotypic analysis of leaf and seed coat color in *ga3ox1* mutant. **(A)** Phenotype of *ga3ox1* mutant leaf color. Bar = 1 cm. **(B)** Determination of chlorophyll content. Three biological replicates were analyzed. **(C)** Phenotype of *ga3ox1* mutant seed coat color. Bar = 0.5 cm. **(D)** Determination of flavonoid content in wild type R108 and *ga3ox1* mutant seeds. Three biological replicates were analyzed and error bars denote the SD. \*\*  $P$  < 0.01 by Duncan test.

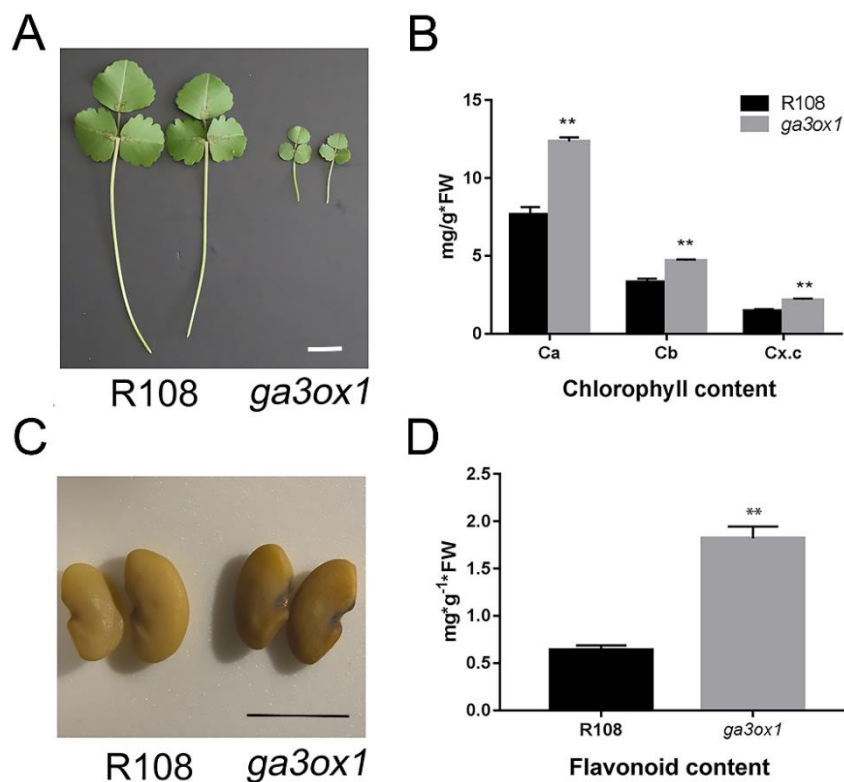

**Supplementary Figure S3** Overexpression of *MtGA3ox1* rescues the dwarf phenotype in *ga3ox1* mutant. **(A)** Phenotype of the overexpression of *MtGA3ox1* in *ga3ox1* mutant. The *ga3ox1* mutant displays a dwarf phenotype, whereas overexpression of *MtGA3ox1* rescues it. Bar = 2 cm. **(B)** Seed coat color was restored by the overexpression of *MtGA3ox1* in *ga3ox1* mutant. The *ga3ox1* mutant seed coat displays a dark brown color, whereas overexpression of *MtGA3ox1* restores it. Bar = 1 cm.

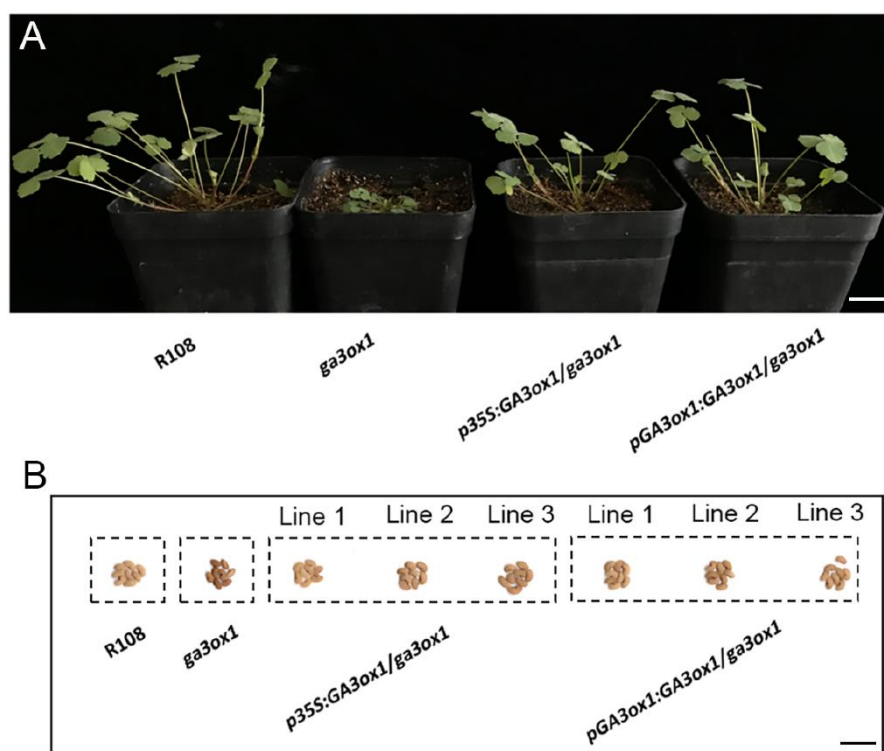

**Supplementary Figure S4** Phenotype of wild type R108 and *ga3ox1* mutant treated with four bioactive gibberellins. **(A)** Phenotype of *ga3ox1* mutant under treatment with 10 $\mu$ mol/L GAs (GA<sub>1</sub>, GA<sub>3</sub>, GA<sub>4</sub>, GA<sub>7</sub>), and SEM images of leaves with a magnification of 500 $\times$  and petioles with a magnification of 200 $\times$ . **(B)** Leaf area of wild type R108 and *ga3ox1* mutant was measured with a leaf area meter. Six single leaves were randomly selected to calculate the cell area. **(C)** Leaf cell area of wild type R108 and *ga3ox1* mutant calculated using the ImageJ software. 10 single cells were randomly selected to calculate the leaf area. **(D)** Petiole length of wild type R108 and *ga3ox1* mutant were measured with a ruler. Six single petioles were randomly selected to calculate petiole length. **(E)** Petiole cell length of wild type R108 and *ga3ox1* mutant calculated using the ImageJ software. 10 single cells were randomly selected to calculate the petiole cell length. Error bars indicate the SD. \*  $P < 0.05$ , and \*\*  $P < 0.01$  by Duncan test.

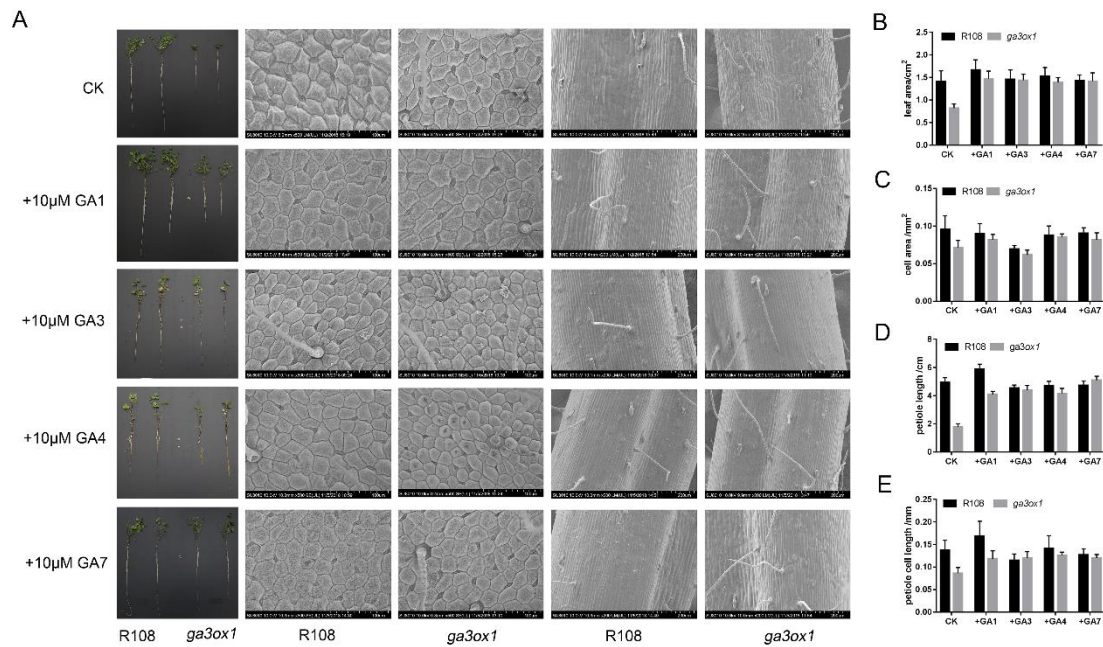

**Supplementary Figure S5** The KEGG enrichment analysis of DEPs and differential metabolites. **(A-B)** KEGG enrichment analysis of upregulated, and downregulated gene expression. **(C)** Significant KEGG enrichment analysis of differential metabolites. The senior bubble was performed using the OmicShare tools, a free online platform for data analysis (<http://www.omicshare.com/tools>). According to the color scale on the right of the figure, each colorized cell represents the gene number, and the color scale indicates the  $P$ -value.

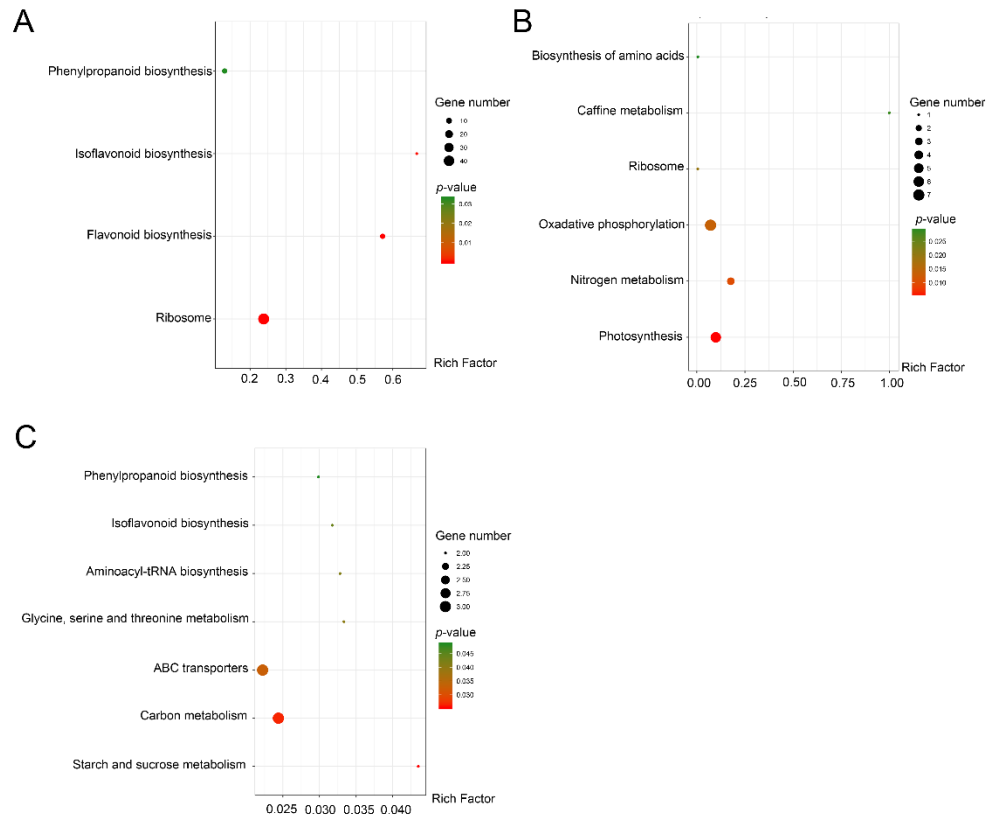

**Supplementary Figure S6** The determination of flavonoid and proanthocyanin and qRT-PCR analysis to confirm the expression pattern of genes related to flavonoid biosynthesis. **(A-G)** Transcriptional expression levels of flavonoid biosynthesis genes determined in the *MtGA3ox1*-overexpression lines. **(H-I)** Flavonoid content and proanthocyanin content of leaves were detected by the spectrophotometry. Three biological replicates were analyzed and error bars denote the SD. DW: dry weight.

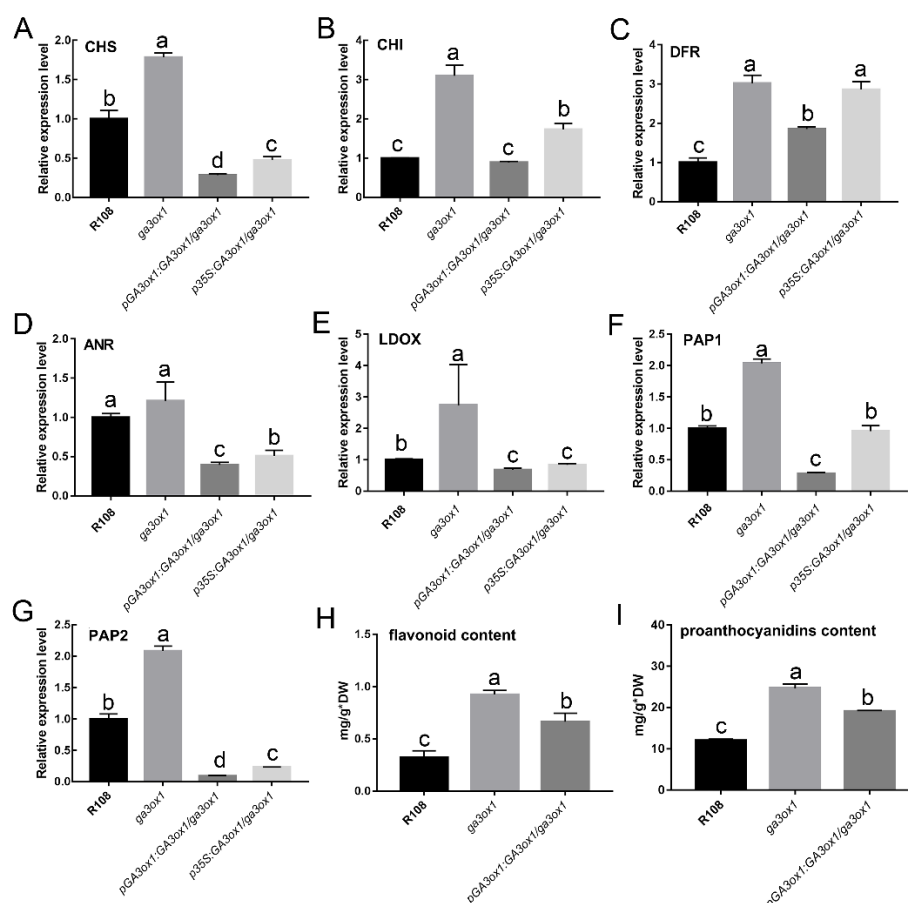

**Supplementary Figure S7** HPLC chromatograms and absorbance spectra of standards. **(A)** HPLC chromatograms and absorbance spectra of standards mixture at the concentration of 1 ppm. **(B-J)** Retention times of myricetin, quercetin, apigenin, kaempferol, isoliquiritigenin, liquiritigenin, dihydromyricetin, dihydroquercetin, and naringenin standards.

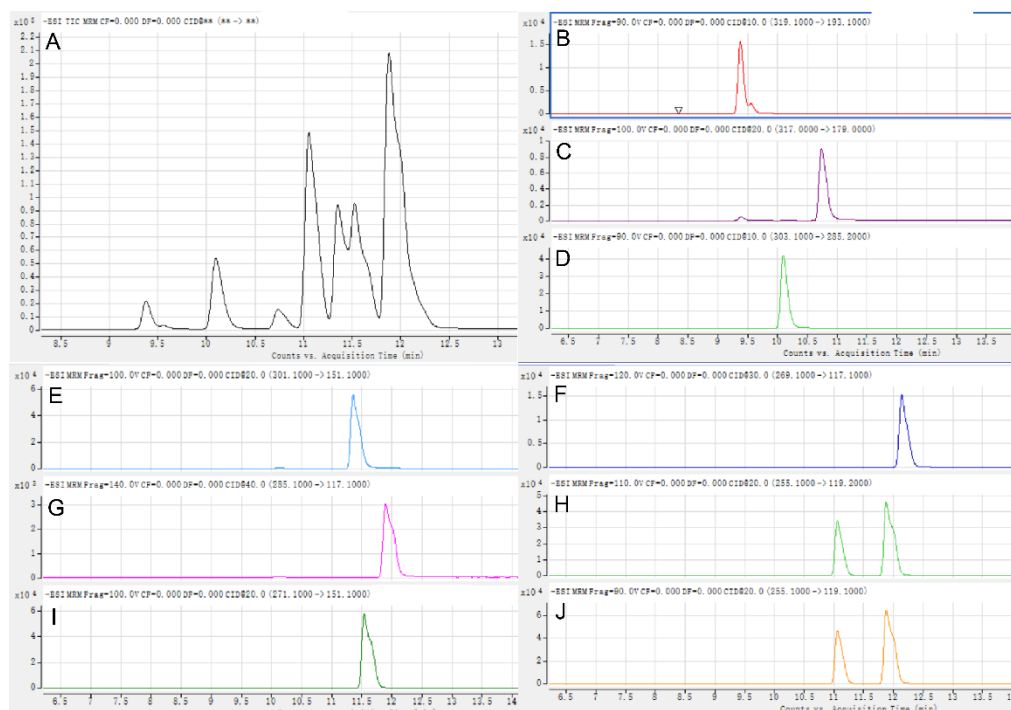

**Supplementary Figure S8** qRT-PCR analysis to confirm the expression pattern of genes related to nitrogen metabolism and transport. **(A-D)** Transcriptional expression levels of several genes associated with nitrogen metabolism and transport were determined in *MtGA3ox1*-overexpression lines. **(E-F)** Glutamine synthase activity and nitrate reductase activity of leaves were detected by the spectrophotometry. Three biological replicates were analyzed and error bars denote the SD. FW: Fresh weight.

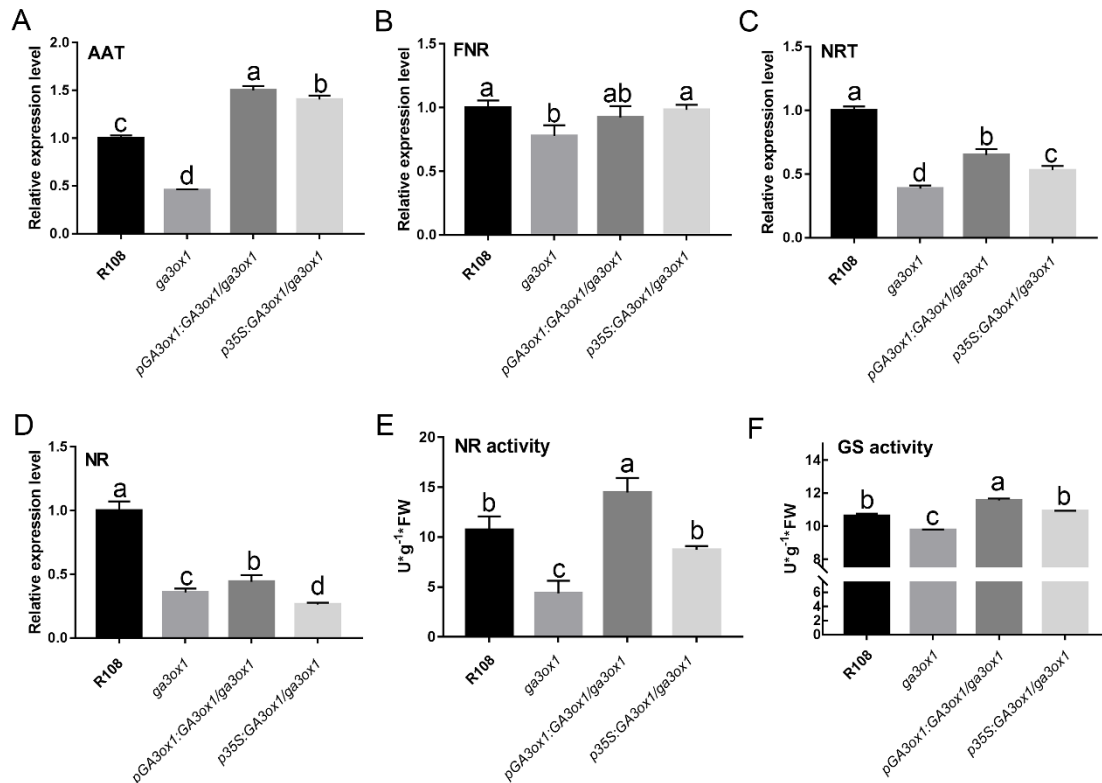

**Supplementary Figure S9** Rhizobia inoculation and determination of DELLA protein and mRNA abundance. **(A)** The determination of DELLA protein and mRNA abundance. Three biological replicates were analyzed and error bars denote the SD. **(B)** Inoculation of symbiotic bacteria and Statistics of the calculation of average nodule number. Ten biological replicates were analyzed and error bars denote the SD. **(C)** The determination of root length and lateral root number. Ten biological replicates were analyzed and error bars denote the SD.

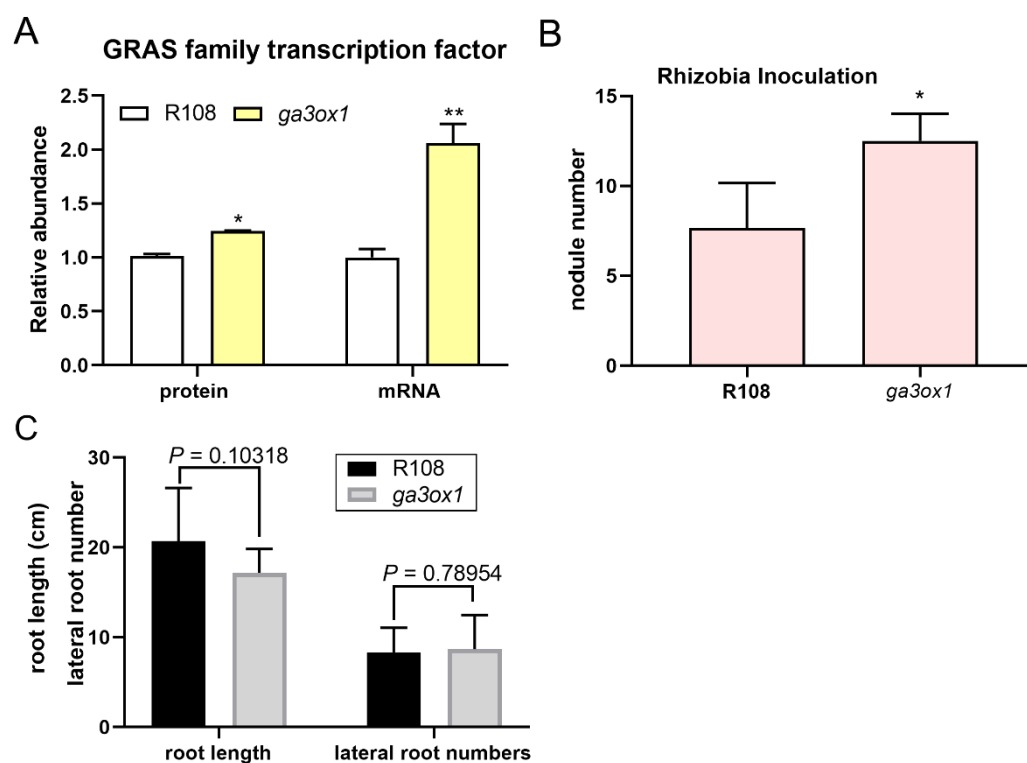

## Supplemental Tables

**Supplementary Table S1** The differentially enriched proteins identified by iTRAQ.

**Supplementary table S2** The KEGG enrichment analysis of DEPs and differential metabolites.

**Supplementary table S3** The differential metabolites identified by HPLC-MS.

**Supplementary table S4** Primer for TAIL-PCR flanking sequence amplification.

**Supplementary table S5** Primers for gene cloning and qRT-PCR.

**Supplementary table S6** Quantitative primers for proteomics validation.

**Supplementary table S7** Quantitative primers of genes related to nitrogen metabolism.

**Supplementary table S8** Quantitative primers of genes involved in flavonoid and isoflavonoid biosynthesis.
